# Supplementary material for: American Heart Association's Life's Simple 7 at Middle Age and Prognosis After Myocardial Infarction in Later Life
Source: PubMed Central journal article supplement — J Am Heart Assoc. 2018 Feb 17;7(4):e007658. doi: 10.1161/JAHA.117.007658 (PMC5850193; doi:10.1161/jaha.117.007658), 2018-02-17
Supplement: JAH3-7-e007658-s001.pdf [file JAH3-7-e007658-s001.pdf]

# **SUPPLEMENTAL MATERIAL**

**Table S1.** Definition of Life's Simple 7 health factors at baseline (1987-1989).

|                   | <b>Ideal</b>                                                                                           | <b>Intermediate</b>                                                                                        | <b>Poor</b>              |
|-------------------|--------------------------------------------------------------------------------------------------------|------------------------------------------------------------------------------------------------------------|--------------------------|
| Smoking           | Never smoker                                                                                           | Former smoker                                                                                              | Current smoker           |
| Body mass index   | <25 kg/m <sup>2</sup>                                                                                  | 25-29.9 kg/m <sup>2</sup>                                                                                  | ≥30 kg/m <sup>2</sup>    |
| Physical activity | ≥150 min/week moderate or<br>≥75 min/week vigorous or<br>≥150 min/week moderate +<br>vigorous activity | 1-149 min/week moderate or 1-<br>74 min/week vigorous or 1-149<br>min/week moderate + vigorous<br>activity | None                     |
| Diet score*       | 4-5 components                                                                                         | 2-3 components                                                                                             | 0-1 components           |
| Total cholesterol | <5.2 mmol/L and not treated                                                                            | 5.2-6.1 or treated to <5.6<br>mmol/L                                                                       | ≥6.2 mmol/L              |
| Blood pressure    | SBP<120 and DBP<80 mmHg<br>and not treated                                                             | SBP 120-139 or DBP 80-88 or<br>treated to SBP <120 and<br>DBP<80 mmHg                                      | SBP ≥140 or DBP ≥90 mmHg |
| Fasting glucose   | <5.6 mmol/L and not treated                                                                            | 5.6-6.9 or treated to <5.6<br>mmol/L                                                                       | 7.0 mmol/L               |

SBP indicates systolic blood pressure; DBP, diastolic blood pressure

\* Meets criteria: Fruits and vegetables ≥4.5 servings/day, Fish ≥two 3-5 oz/week, Fiber-rich whole grains ≥3 servings/day, Sodium <1500mg/day, and sugar-sweetened beverages ≤4 glasses/week

**Table S2.** Baseline characteristics for study population according to score of Life's Simple 7, N=13,079.

|                                      | <b>Score of Life's Simple 7</b> |                        |                          |                          |                          |
|--------------------------------------|---------------------------------|------------------------|--------------------------|--------------------------|--------------------------|
|                                      | <b>Total<br/>(N=13,079)</b>     | <b>0-3<br/>(N=374)</b> | <b>4-6<br/>(N=3,137)</b> | <b>7-9<br/>(N=6,042)</b> | <b>≥10<br/>(N=3,526)</b> |
| Age, years                           | 54.5 (5.7)                      | 55.1 (5.6)             | 55.1 (5.6)               | 54.6 (5.8)               | 53.5 (5.7)               |
| Female                               | 56.2%                           | 62.8%                  | 53.8%                    | 52.4%                    | 64.2%                    |
| Blacks                               | 24.4%                           | 59.4%                  | 38.7%                    | 22.4%                    | 11.3%                    |
| Health insurance (yes)               | 91.1%                           | 75.9%                  | 86.4%                    | 91.7%                    | 95.8%                    |
| Family income for the past 12 months |                                 |                        |                          |                          |                          |
| ≥\$25,000                            | 62.5%                           | 28.7%                  | 49.4%                    | 63.5%                    | 76.0%                    |
| Highest education                    |                                 |                        |                          |                          |                          |
| ≥12 years                            | 78.5%                           | 54.3%                  | 67.4%                    | 70.4%                    | 89.3%                    |
| Body mass index, kg/m <sup>2</sup>   | 27.5 (5.2)                      | 33.1 (5.1)             | 30.2 (5.5)               | 27.4 (4.8)               | 24.5 (3.4)               |
| Systolic blood pressure, mmHg        | 120.6 (18.3)                    | 139.1 (20.4)           | 129.7 (19.8)             | 120.5 (16.7)             | 110.8 (13.0)             |
| Diastolic blood pressure, mmHg       | 73.5 (11.0)                     | 82.0 (12.5)            | 78.1 (11.9)              | 73.4 (10.3)              | 68.8 (8.8)               |
| Fasting glucose, mmol/L              | 5.9 (1.8)                       | 7.9 (3.5)              | 6.6 (2.6)                | 5.7 (1.4)                | 5.3 (0.8)                |
| Total cholesterol, mmol/L            | 5.5 (1.1)                       | 6.5 (1.0)              | 6.0 (1.1)                | 5.5 (1.0)                | 5.1 (0.9)                |
| HDL cholesterol, mmol/L              | 1.4 (0.4)                       | 1.2 (0.4)              | 1.3 (0.4)                | 1.3 (0.4)                | 1.5 (0.5)                |
| LDL cholesterol, mmol/L              | 3.5 (1.0)                       | 4.5 (1.0)              | 3.9 (1.1)                | 3.6 (1.0)                | 3.1 (0.8)                |
| <b>Life's Simple 7</b>               |                                 |                        |                          |                          |                          |
| Smoking status                       |                                 |                        |                          |                          |                          |
| Intermediate                         | 31.8%                           | 29.7%                  | 32.4%                    | 34.0%                    | 27.8%                    |
| Ideal                                | 43.2%                           | 15.0%                  | 29.4%                    | 40.7%                    | 62.8%                    |
| Body mass index                      |                                 |                        |                          |                          |                          |
| Intermediate                         | 39.7%                           | 17.4%                  | 38.5%                    | 46.4%                    | 31.5%                    |
| Ideal                                | 34.5%                           | 2.7%                   | 13.3%                    | 30.5%                    | 63.6%                    |
| Physical activity                    |                                 |                        |                          |                          |                          |
| Intermediate                         | 4.1%                            | 2.1%                   | 3.6%                     | 4.7%                     | 3.7%                     |
| Ideal                                | 59.8%                           | 2.9%                   | 26.7%                    | 62.8%                    | 90.1%                    |
| Healthy diet                         |                                 |                        |                          |                          |                          |
| Intermediate                         | 44.0%                           | 15.5%                  | 32.5%                    | 45.0%                    | 55.6%                    |
| Ideal                                | 6.3%                            | 0.8%                   | 2.0%                     | 4.7%                     | 13.4%                    |
| Total cholesterol                    |                                 |                        |                          |                          |                          |
| Intermediate                         | 36.1%                           | 27.0%                  | 35.6%                    | 39.8%                    | 31.1%                    |
| Ideal                                | 39.4%                           | 4.8%                   | 23.1%                    | 37.3%                    | 61.0%                    |
| Blood pressure                       |                                 |                        |                          |                          |                          |
| Intermediate                         | 42.2%                           | 38.8%                  | 50.9%                    | 47.6%                    | 25.4%                    |
| Ideal                                | 41.5%                           | 3.5%                   | 16.7%                    | 39.0%                    | 71.7%                    |
| Glucose                              |                                 |                        |                          |                          |                          |
| Intermediate                         | 35.6%                           | 47.6%                  | 50.7%                    | 38.6%                    | 15.9%                    |
| Ideal                                | 56.8%                           | 11.8%                  | 31.7%                    | 57.0%                    | 83.5%                    |

HDL indicates high-density lipoprotein; LDL, low-density lipoprotein

**Table S3.** Risk of incident myocardial infarction by Life's Simple 7 Health Factors, N=13,079.

| <b>Life's Simple 7 factors</b> | <b>Poor</b>  | <b>Intermediate</b> | <b>Ideal</b>     |
|--------------------------------|--------------|---------------------|------------------|
| <b>Smoking status</b>          |              |                     |                  |
| N (%)                          | 3,272 (25.0) | 4,156 (31.8)        | 5,651 (43.2)     |
| Cases                          | 433          | 416                 | 428              |
| HR (95%CI)                     | 1 (ref.)     | 0.50 (0.43-0.57)    | 0.44 (0.39-0.51) |
| <b>Body mass index</b>         |              |                     | 456              |
| N (%)                          | 3,377 (25.8) | 5,190 (40.0)        | 4,512 (34.5)     |
| Cases                          | 385          | 551                 | 341              |
| HR (95%CI)                     | 1 (ref.)     | 0.91 (0.79-1.04)    | 0.78 (0.67-0.92) |
| <b>Physical activity</b>       |              |                     |                  |
| N (%)                          | 4,726 (36.1) | 533 (4.1)           | 7,820 (59.8)     |
| Cases                          | 511          | 53                  | 713              |
| HR (95%CI)                     | 1 (ref.)     | 1.05 (0.79-1.39)    | 0.85 (0.75-0.96) |
| <b>Healthy diet</b>            |              |                     |                  |
| N (%)                          | 6,498 (49.7) | 5,759 (44.0)        | 822 (6.3)        |
| Cases                          | 649          | 560                 | 68               |
| HR (95%CI)                     | 1 (ref.)     | 0.98 (0.87-1.09)    | 0.89 (0.69-1.14) |
| <b>Total cholesterol</b>       |              |                     |                  |
| N (%)                          | 3,211 (24.6) | 4,718 (36.1)        | 5,150 (39.4)     |
| Cases                          | 429          | 478                 | 370              |
| HR (95%CI)                     | 1 (ref.)     | 0.78 (0.69-0.89)    | 0.56 (0.49-0.65) |
| <b>Blood pressure</b>          |              |                     |                  |
| N (%)                          | 2,142 (16.4) | 5,514 (42.2)        | 5,423 (41.5)     |
| Cases                          | 310          | 608                 | 359              |
| HR (95%CI)                     | 1 (ref.)     | 0.73 (0.63-0.84)    | 0.48 (0.41-0.56) |
| <b>Fasting glucose</b>         |              |                     |                  |
| N (%)                          | 993 (7.6)    | 4,662 (35.6)        | 7,424 (56.8)     |
| Cases                          | 207          | 482                 | 588              |
| HR (95%CI)                     | 1 (ref.)     | 0.43 (0.36-0.50)    | 0.40 (0.34-0.47) |

CI indicates confidence interval; HR, hazard ratio

\*Adjusted for age, sex, race and each of Life's Simple 7 health factors

**Table S4.** Hazard ratio (95% CI) of adverse outcomes after incident myocardial infarction according to score of Life's Simple 7 among myocardial infarction patients after adjusting socioeconomic status and myocardial infarction severity.

|                                 | Score of Life's Simple 7 |                  |                  |                  | P for trend |
|---------------------------------|--------------------------|------------------|------------------|------------------|-------------|
|                                 | 0-3<br>(N=77)            | 4-6<br>(N=445)   | 7-9<br>(N=593)   | ≥10<br>(N=162)   |             |
| <b>Composite outcome</b>        |                          |                  |                  |                  |             |
| Cases                           | 71                       | 345              | 421              | 81               |             |
| Model 3 (N=1,250)               | 1 (ref.)                 | 0.80 (0.61-1.05) | 0.75 (0.56-0.99) | 0.55 (0.38-0.79) | 0.002       |
| Model 4 (N=890)                 | 1 (ref.)                 | 0.95 (0.69-1.31) | 0.84 (0.60-1.18) | 0.54 (0.34-0.83) | 0.002       |
| Model 5                         | 1 (ref.)                 | 0.80 (0.62-1.05) | 0.74 (0.56-0.97) | 0.53 (0.37-0.76) | 0.01        |
| <b>All-cause mortality</b>      |                          |                  |                  |                  |             |
| Cases                           | 57                       | 273              | 287              | 44               |             |
| Model 3 (N=1,250)               | 1 (ref.)                 | 0.81 (0.60-1.10) | 0.54 (0.39-0.74) | 0.33 (0.21-0.51) | <0.001      |
| Model 4 (N=890)                 | 1 (ref.)                 | 0.93 (0.65-1.34) | 0.53 (0.36-0.78) | 0.29 (0.17-0.50) | <0.001      |
| Model 5                         | 1 (ref.)                 | 0.79 (0.58-1.06) | 0.52 (0.38-0.70) | 0.32 (0.21-0.49) | <0.001      |
| <b>Cardiovascular mortality</b> |                          |                  |                  |                  |             |
| Cases                           | 32                       | 112              | 104              | 10               |             |
| Model 3 (N=1,250)               | 1 (ref.)                 | 0.81 (0.53-1.24) | 0.59 (0.38-0.93) | 0.31 (0.14-0.67) | <0.001      |
| Model 4 (N=890)                 | 1 (ref.)                 | 0.76 (0.47-1.23) | 0.48 (0.29-0.82) | 0.24 (0.09-0.63) | <0.001      |
| Model 5                         | 1 (ref.)                 | 0.79 (0.52-1.19) | 0.56 (0.36-0.88) | 0.28 (0.13-0.60) | <0.001      |
| <b>Recurrent MI</b>             |                          |                  |                  |                  |             |
| Cases                           | 24                       | 113              | 131              | 24               |             |
| Model 3 (N=1,250)               | 1 (ref.)                 | 0.91 (0.57-1.44) | 0.79 (0.49-1.27) | 0.59 (0.31-1.11) | 0.065       |
| Model 4 (N=890)                 | 1 (ref.)                 | 1.00 (0.59-1.69) | 0.76 (0.44-1.31) | 0.66 (0.32-1.35) | 0.058       |
| Model 5                         | 1 (ref.)                 | 0.91 (0.57-1.43) | 0.77 (0.48-1.23) | 0.58 (0.31-1.07) | 0.040       |
| <b>Heart failure</b>            |                          |                  |                  |                  |             |
| Cases                           | 53                       | 211              | 254              | 53               |             |
| Model 3 (N=1,250)               | 1 (ref.)                 | 0.73 (0.53-1.01) | 0.71 (0.51-0.99) | 0.66 (0.43-1.02) | 0.122       |
| Model 4 (N=890)                 | 1 (ref.)                 | 0.75 (0.51-1.09) | 0.72 (0.49-1.07) | 0.55 (0.32-0.94) | 0.066       |
| Model 5                         | 1 (ref.)                 | 0.73 (0.53-1.00) | 0.69 (0.50-0.96) | 0.61 (0.40-0.94) | 0.049       |
| <b>Stroke</b>                   |                          |                  |                  |                  |             |
| Cases                           | 7                        | 55               | 58               | 9                |             |
| Model 3 (N=1,250)               | 1 (ref.)                 | 1.74 (0.78-3.91) | 1.52 (0.66-3.48) | 1.17 (0.40-3.40) | 0.821       |
| Model 4 (N=890)                 | 1 (ref.)                 | 1.13 (0.49-2.60) | 1.02 (0.43-2.41) | 0.49 (0.13-1.81) | 0.328       |
| Model 5                         | 1 (ref.)                 | 1.77 (0.79-3.96) | 1.49 (0.65-3.37) | 1.19 (0.38-3.16) | 0.644       |

CI indicates confidence interval; MI, myocardial infarction

Model 3: Adjusted for Model 1 + year of school completed ( $\leq 12$  and  $> 12$  years) and family income for the past 12 months ( $< \$35,000$  and  $\geq \$35,000$ ) at baseline

Model 4: Adjusted for Model 1 + MI severity

Model 5: Adjusted for Model 1 + aspirin use

**Table S5.** Adjusted hazard ratio (95% CI) \* of adverse outcomes after incident myocardial infarction according to score of Life's Simple 7 among myocardial infarction patients after excluding those who died within 14 days after myocardial infarction (N=1,245).

|                                 | Score of Life's Simple 7 |                  |                  |                  | P for trend |
|---------------------------------|--------------------------|------------------|------------------|------------------|-------------|
|                                 | 0-3<br>(N=76)            | 4-6<br>(N=428)   | 7-9<br>(N=583)   | ≥10<br>(N=158)   |             |
| <b>Composite outcome</b>        |                          |                  |                  |                  |             |
| Cases                           | 68                       | 318              | 384              | 70               |             |
| Model1                          | 1 (ref.)                 | 0.75 (0.57-0.98) | 0.61 (0.46-0.81) | 0.43 (0.30-0.63) | <0.001      |
| Model2a                         | 1 (ref.)                 | 0.75 (0.57-0.99) | 0.62 (0.47-0.82) | 0.44 (0.31-0.64) | <0.001      |
| Model2b (N=1,159)               | 1 (ref.)                 | 0.73 (0.54-1.00) | 0.63 (0.46-0.87) | 0.46 (0.31-0.69) | <0.001      |
| <b>All-cause mortality</b>      |                          |                  |                  |                  |             |
| Cases                           | 56                       | 256              | 278              | 40               |             |
| Model1                          | 1 (ref.)                 | 0.75 (0.55-1.01) | 0.51 (0.37-0.69) | 0.29 (0.19-0.45) | <0.001      |
| Model2a                         | 1 (ref.)                 | 0.75 (0.55-1.01) | 0.51 (0.37-0.70) | 0.29 (0.19-0.46) | <0.001      |
| Model2b (N=1,159)               | 1 (ref.)                 | 0.80 (0.56-1.14) | 0.59 (0.41-0.86) | 0.32 (0.19-0.52) | <0.001      |
| <b>Cardiovascular mortality</b> |                          |                  |                  |                  |             |
| Cases                           | 32                       | 109              | 100              | 10               |             |
| Model1                          | 1 (ref.)                 | 0.69 (0.45-1.05) | 0.42 (0.27-0.66) | 0.21 (0.10-0.44) | <0.001      |
| Model2a                         | 1 (ref.)                 | 0.69 (0.46-1.06) | 0.42 (0.27-0.66) | 0.21 (0.10-0.45) | <0.001      |
| Model2b (N=1,159)               | 1 (ref.)                 | 0.69 (0.42-1.16) | 0.50 (0.29-0.86) | 0.23 (0.10-0.54) | <0.001      |
| <b>Recurrent MI</b>             |                          |                  |                  |                  |             |
| Cases                           | 24                       | 112              | 131              | 24               |             |
| Model1                          | 1 (ref.)                 | 0.91 (0.58-1.44) | 0.80 (0.50-1.27) | 0.60 (0.32-1.11) | 0.061       |
| Model2a                         | 1 (ref.)                 | 0.92 (0.59-1.46) | 0.82 (0.51-1.31) | 0.62 (0.33-1.16) | 0.093       |
| Model2b (N=1,159)               | 1 (ref.)                 | 1.04 (0.59-1.81) | 0.92 (0.52-1.64) | 0.75 (0.37-1.53) | 0.255       |
| <b>Heart failure</b>            |                          |                  |                  |                  |             |
| Cases                           | 40                       | 145              | 169              | 37               |             |
| Model1                          | 1 (ref.)                 | 0.57 (0.40-0.83) | 0.46 (0.32-0.67) | 0.43 (0.26-0.71) | 0.001       |
| Model2a                         | 1 (ref.)                 | 0.57 (0.40-0.83) | 0.46 (0.32-0.67) | 0.44 (0.26-0.72) | 0.001       |
| Model2b (N=1,159)               | 1 (ref.)                 | 0.54 (0.35-0.82) | 0.47 (0.31-0.73) | 0.48 (0.28-0.83) | 0.021       |
| <b>Stroke</b>                   |                          |                  |                  |                  |             |
| Cases                           | 6                        | 50               | 47               | 7                |             |
| Model1                          | 1 (ref.)                 | 1.88 (0.79-4.46) | 1.39 (0.57-3.38) | 0.94 (0.29-3.02) | 0.326       |
| Model2a                         | 1 (ref.)                 | 1.90 (0.80-4.54) | 1.36 (0.56-3.32) | 0.92 (0.29-2.96) | 0.280       |
| Model2b (N=1,159)               | 1 (ref.)                 | 1.96 (0.69-5.60) | 1.78 (0.61-5.18) | 1.23 (0.33-4.53) | 0.838       |

CI indicates confidence interval; MI, myocardial infarction

Model 1: Adjusted for age at MI, sex, race and calendar year of incident MI (<1995, 1995-2004, and ≥2005), history of heart failure, stroke, coronary artery bypass graft, peripheral artery disease, kidney dysfunction, hypertension, diabetes, and current smoking at admission

Model 2a: Adjusted for Model 1+ health insurance at baseline

Model 2b: Adjusted for Model 1 + health insurance at admission

**Table S6.** Adjusted hazard ratio (95% CI) \* of adverse outcomes after restricting follow-up time after incident myocardial infarction according to score of Life's Simple 7 among myocardial infarction patients.

|                          | Score of Life's Simple 7 |                  |                  |                  | P for trend |
|--------------------------|--------------------------|------------------|------------------|------------------|-------------|
|                          | 0-3                      | 4-6              | 7-9              | ≥10              |             |
| <b>1 year</b>            | N=55                     | N=377            | N=488            | N=146            |             |
| Composite outcome        |                          |                  |                  |                  |             |
| Cases                    | 31                       | 143              | 179              | 41               |             |
| Model 2b                 | 1 (ref.)                 | 0.75 (0.50-1.13) | 0.75 (0.50-1.14) | 0.69 (0.41-1.16) | 0.311       |
| All-cause mortality      |                          |                  |                  |                  |             |
| Cases                    | 12                       | 59               | 53               | 11               |             |
| Model 2b                 | 1 (ref.)                 | 0.78 (0.40-1.50) | 0.48 (0.24-0.96) | 0.39 (0.16-0.96) | 0.003       |
| Cardiovascular mortality |                          |                  |                  |                  |             |
| Cases                    | 3                        | 24               | 18               | 3                |             |
| Model 2b                 | 1 (ref.)                 | 1.62 (0.46-5.65) | 0.99 (0.27-3.66) | 0.79 (0.14-4.38) | 0.259       |
| Recurrent MI             |                          |                  |                  |                  |             |
| Cases                    | 2                        | 23               | 30               | 4                |             |
| Model 2b                 | 1 (ref.)                 | 1.99 (0.46-8.64) | 2.06 (0.47-9.09) | 0.93 (0.16-5.51) | 0.707       |
| Heart failure            |                          |                  |                  |                  |             |
| Cases                    | 25                       | 111              | 129              | 35               |             |
| Model 2b                 | 1 (ref.)                 | 0.80 (0.51-1.26) | 0.78 (0.49-1.25) | 0.92 (0.52-1.63) | 0.867       |
| Stroke                   |                          |                  |                  |                  |             |
| Cases                    | 3                        | 13               | 15               | 3                |             |
| Model 2b                 | 1 (ref.)                 | 0.79 (0.21-2.93) | 0.92 (0.24-3.60) | 0.90 (0.15-5.31) | 0.888       |
| <b>3 years</b>           | N=53                     | N=350            | N=439            | N=131            |             |
| Composite outcome        |                          |                  |                  |                  |             |
| Cases                    | 30                       | 163              | 201              | 38               |             |
| Model 2b                 | 1 (ref.)                 | 0.77 (0.51-1.16) | 0.76 (0.50-1.14) | 0.71 (0.42-1.20) | 0.316       |
| All-cause mortality      |                          |                  |                  |                  |             |
| Cases                    | 15                       | 85               | 77               | 15               |             |
| Model 2b                 | 1 (ref.)                 | 0.76 (0.42-1.39) | 0.57 (0.31-1.06) | 0.62 (0.27-1.40) | 0.058       |
| Cardiovascular mortality |                          |                  |                  |                  |             |
| Cases                    | 6                        | 36               | 27               | 5                |             |
| Model 2b                 | 1 (ref.)                 | 1.20 (0.46-3.09) | 0.66 (0.23-1.86) | 1.06 (0.27-4.19) | 0.253       |
| Recurrent MI             |                          |                  |                  |                  |             |
| Cases                    | 6                        | 41               | 45               | 3                |             |
| Model 2b                 | 1 (ref.)                 | 0.83 (0.34-2.06) | 0.76 (0.29-1.98) | 0.31 (0.07-1.36) | 0.175       |
| Heart failure            |                          |                  |                  |                  |             |
| Cases                    | 24                       | 120              | 128              | 31               |             |
| Model 2b                 | 1 (ref.)                 | 0.79 (0.50-1.25) | 0.80 (0.50-1.29) | 0.93 (0.51-1.68) | 0.999       |
| Stroke                   |                          |                  |                  |                  |             |
| Cases                    | 3                        | 18               | 26               | 5                |             |
| Model 2b                 | 1.00                     | 1.06 (0.30-3.79) | 0.80 (0.20-3.16) | 1.55 (0.30-7.91) | 0.944       |
| <b>5 years</b>           | N=49                     | N=314            | N=392            | N=112            |             |
| Composite outcome        |                          |                  |                  |                  |             |
| Cases                    | 32                       | 155              | 198              | 39               |             |
| Model 2b                 | 1 (ref.)                 | 0.89 (0.60-1.34) | 0.95 (0.63-1.43) | 0.79 (0.47-1.33) | 0.684       |
| All-cause mortality      |                          |                  |                  |                  |             |
| Cases                    | 16                       | 86               | 87               | 16               |             |
| Model 2b                 | 1 (ref.)                 | 0.98 (0.55-1.74) | 0.69 (0.38-1.24) | 0.58 (0.26-1.28) | 0.023       |
| Cardiovascular mortality |                          |                  |                  |                  |             |
| Cases                    | 5                        | 38               | 31               | 6                |             |
| Model 2b                 | 1 (ref.)                 | 0.78 (0.28-2.17) | 0.49 (0.16-1.47) | 0.80 (0.20-3.21) | 0.251       |
| Recurrent MI             |                          |                  |                  |                  |             |
| Cases                    | 7                        | 46               | 53               | 10               |             |
| Model 2b                 | 1 (ref.)                 | 0.66 (0.29-1.52) | 0.62 (0.26-1.49) | 0.29 (0.10-0.89) | 0.047       |
| Heart failure            |                          |                  |                  |                  |             |
| Cases                    | 25                       | 110              | 118              | 29               |             |
| Model 2b                 | 1 (ref.)                 | 0.95 (0.59-1.51) | 1.01 (0.62-1.64) | 1.11 (0.60-2.05) | 0.580       |
| Stroke                   |                          |                  |                  |                  |             |
| Cases                    | 4                        | 21               | 33               | 4                |             |
| Model 2b                 | 1 (ref.)                 | 0.75 (0.24-2.36) | 0.73 (0.22-2.38) | 1.20 (0.25-5.68) | 0.936       |

CI indicates confidence interval; MI, myocardial infarction

Model 2b: Adjusted for Model 1 + health insurance at admission

**Table S7.** Hazard ratios (95%CI)\* for composite outcome according to the status of each individual Life's Simple 7 factor among those who had incident myocardial infarction during follow-up, N=1,277.

| <b>Life's Simple 7 factors</b> | <b>Poor</b> | <b>Intermediate</b> | <b>Ideal</b>     |
|--------------------------------|-------------|---------------------|------------------|
| <b>Smoking status</b>          |             |                     |                  |
| N (%)                          | 433 (33.9)  | 416 (32.6)          | 428 (33.5)       |
| Cases                          | 326         | 299                 | 293              |
| Model 1                        | 1 (ref.)    | 0.90 (0.74-1.10)    | 0.80 (0.65-0.97) |
| Model 2a                       | 1 (ref.)    | 0.90 (0.74-1.10)    | 0.80 (0.65-0.98) |
| Model 2b (N=1,102)             | 1 (ref.)    | 0.96 (0.77-1.19)    | 0.85 (0.69-1.06) |
| <b>Body mass index</b>         |             |                     |                  |
| N (%)                          | 385 (30.2)  | 551 (43.2)          | 341 (26.7)       |
| Cases                          | 309         | 386                 | 223              |
| Model 1                        | 1 (ref.)    | 0.84 (0.72-0.99)    | 0.77 (0.63-0.93) |
| Model 2a                       | 1 (ref.)    | 0.84 (0.72-0.99)    | 0.77 (0.63-0.93) |
| Model 2b (N=1,102)             | 1 (ref.)    | 0.87 (0.73-1.04)    | 0.77 (0.63-0.95) |
| <b>Physical activity</b>       |             |                     |                  |
| N (%)                          | 511 (40.0)  | 53 (4.2)            | 713 (55.8)       |
| Cases                          | 389         | 40                  | 489              |
| Model 1                        | 1 (ref.)    | 1.24 (0.89-1.73)    | 0.97 (0.84-1.11) |
| Model 2a                       | 1 (ref.)    | 1.23 (0.89-1.72)    | 0.97 (0.84-1.12) |
| Model 2b (N=1,102)             | 1 (ref.)    | 1.18 (0.81-1.71)    | 0.97 (0.83-1.14) |
| <b>Healthy diet</b>            |             |                     |                  |
| N (%)                          | 649 (50.8)  | 560 (43.9)          | 68 (5.3)         |
| Cases                          | 460         | 408                 | 50               |
| Model 1                        | 1 (ref.)    | 1.05 (0.91-1.20)    | 1.23 (0.92-1.66) |
| Model 2a                       | 1 (ref.)    | 1.05 (0.92-1.21)    | 1.24 (0.92-1.68) |
| Model 2b (N=1,102)             | 1 (ref.)    | 1.08 (0.93-1.26)    | 1.16 (0.84-1.62) |
| <b>Total cholesterol</b>       |             |                     |                  |
| N (%)                          | 429 (33.6)  | 478 (37.4)          | 370 (29.0)       |
| Cases                          | 308         | 339                 | 271              |
| Model 1                        | 1 (ref.)    | 1.06 (0.91-1.24)    | 1.18 (0.99-1.39) |
| Model 2a                       | 1 (ref.)    | 1.07 (0.91-1.25)    | 1.18 (1.00-1.40) |
| Model 2b (N=1,102)             | 1 (ref.)    | 1.05 (0.88-1.25)    | 1.16 (0.97-1.40) |
| <b>Blood pressure</b>          |             |                     |                  |
| N (%)                          | 310 (24.3)  | 608 (47.6)          | 359 (28.1)       |
| Cases                          | 262         | 429                 | 227              |
| Model 1                        | 1 (ref.)    | 0.79 (0.68-0.94)    | 0.75 (0.61-0.92) |
| Model 2a                       | 1 (ref.)    | 0.79 (0.68-0.93)    | 0.75 (0.61-0.92) |
| Model 2b (N=1,102)             | 1 (ref.)    | 0.80 (0.67-0.96)    | 0.71 (0.56-0.89) |
| <b>Fasting glucose</b>         |             |                     |                  |
| N (%)                          | 207 (16.2)  | 482 (37.7)          | 588 (46.1)       |
| Cases                          | 190         | 341                 | 387              |
| Model 1                        | 1 (ref.)    | 0.61 (0.50-0.74)    | 0.58 (0.47-0.73) |
| Model 2a                       | 1 (ref.)    | 0.61 (0.50-0.74)    | 0.59 (0.47-0.73) |
| Model 2b (N=1,102)             | 1 (ref.)    | 0.66 (0.53-0.82)    | 0.68 (0.53-0.87) |

CI indicates confidence interval; MI, myocardial infarction

Model 1: Adjusted for age at MI, sex, race and calendar year of incident MI (<1995, 1995-2004, and ≥2005), history of heart failure, stroke, coronary artery bypass graft, peripheral artery disease, kidney dysfunction, hypertension, diabetes, and current smoking at admission

Model 2a: Adjusted for Model 1 + health insurance at baseline

Model 2b: Adjusted for Model 1 + health insurance at admission



**Figure S1.** Study design.

**Analysis 1: The association of Life's Simple 7 with Incident MI in the entire study population**

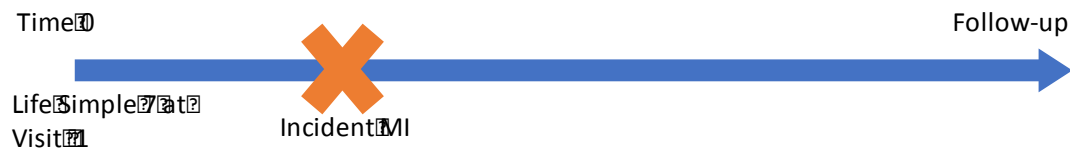

**Analysis 2: The association of Life's Simple 7 with adverse outcomes after Incident MI**

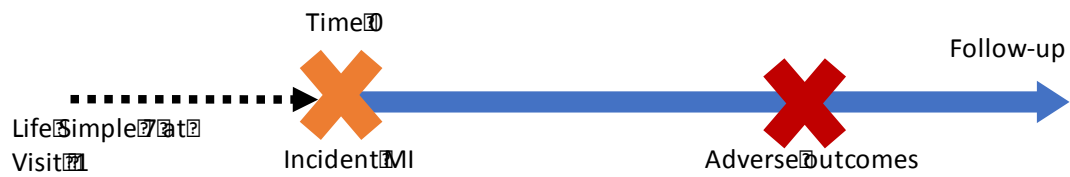

MI indicates myocardial infarction.

**Figure S2.** Flow chart of study population.

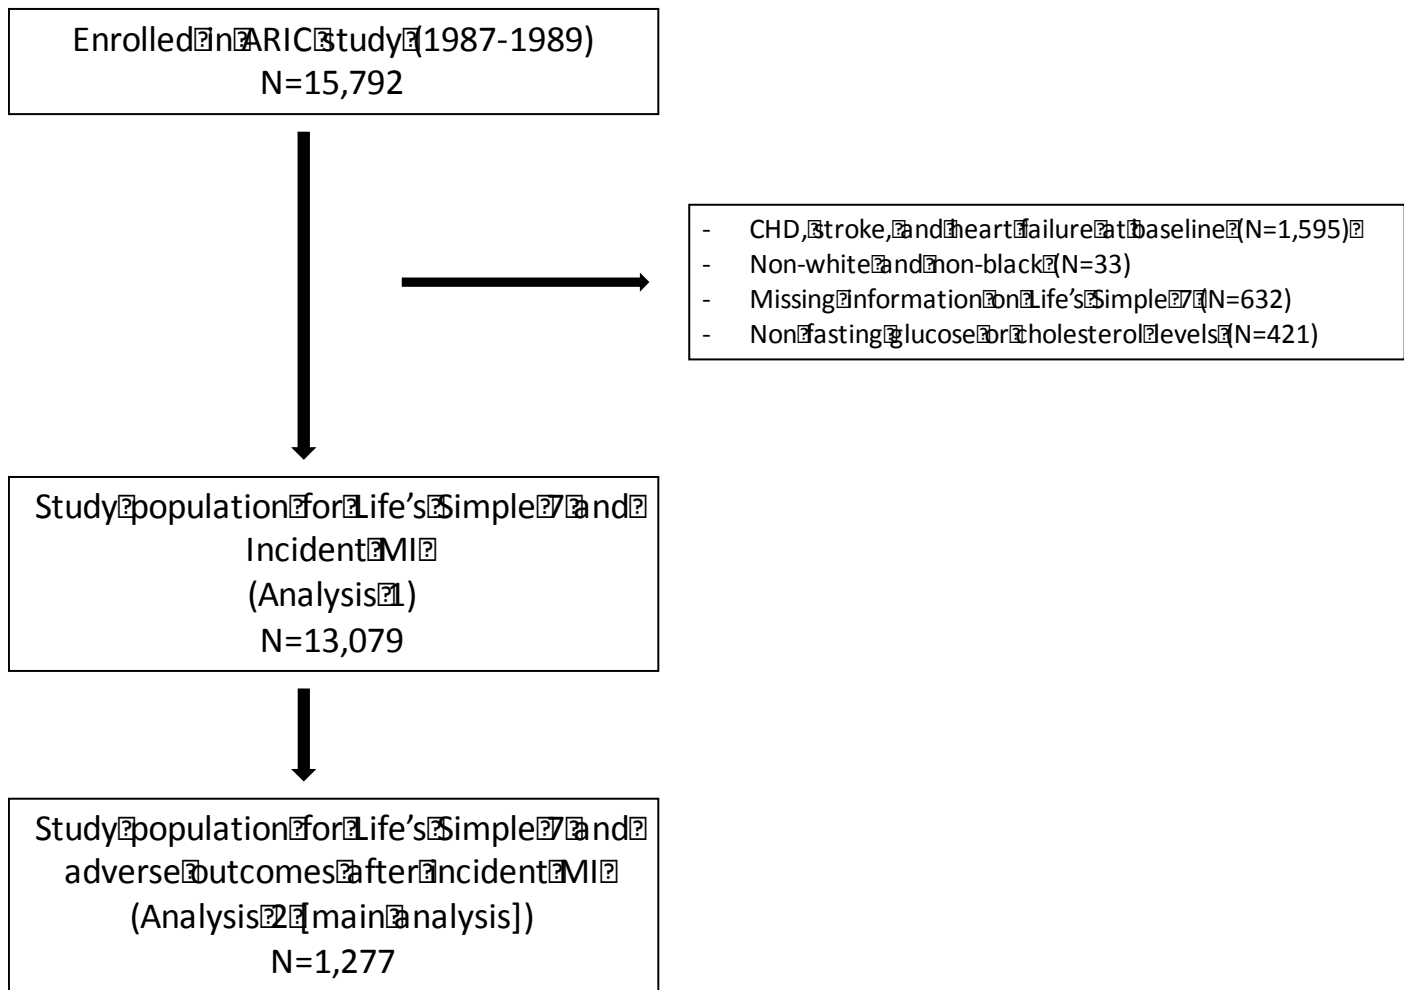

ARIC indicates the Atherosclerosis Risk in Communities Study; CHD, coronary heart disease; MI, myocardial infarction

**Figure S3.** Kaplan-Meier curves for incident myocardial infarction by the score of Life's Simple 7 in the entire study population.

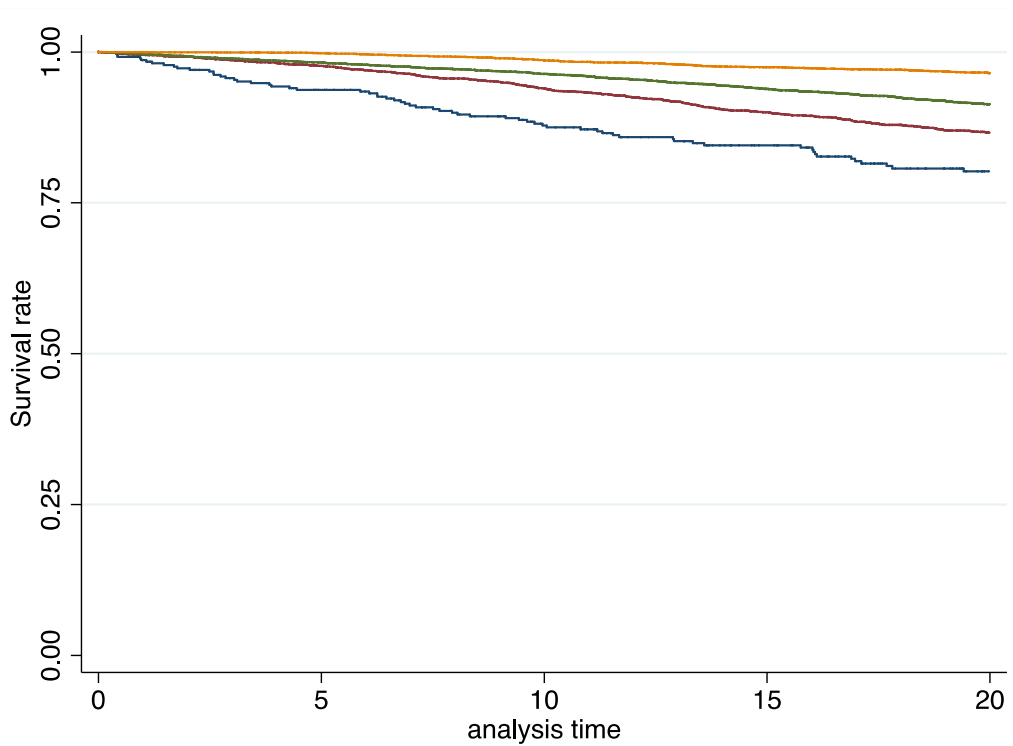

The legend indicates the score of ideal Simple 7 metrics (blue: 0-3, red: 4-6, green: 7-9, orange:  $\geq 10$ )

**Figure S4.** Kaplan-Meier curves for cardiovascular mortality, recurrent myocardial infarction, heart failure, and stroke by Life's simple 7 score among myocardial infarction patients.

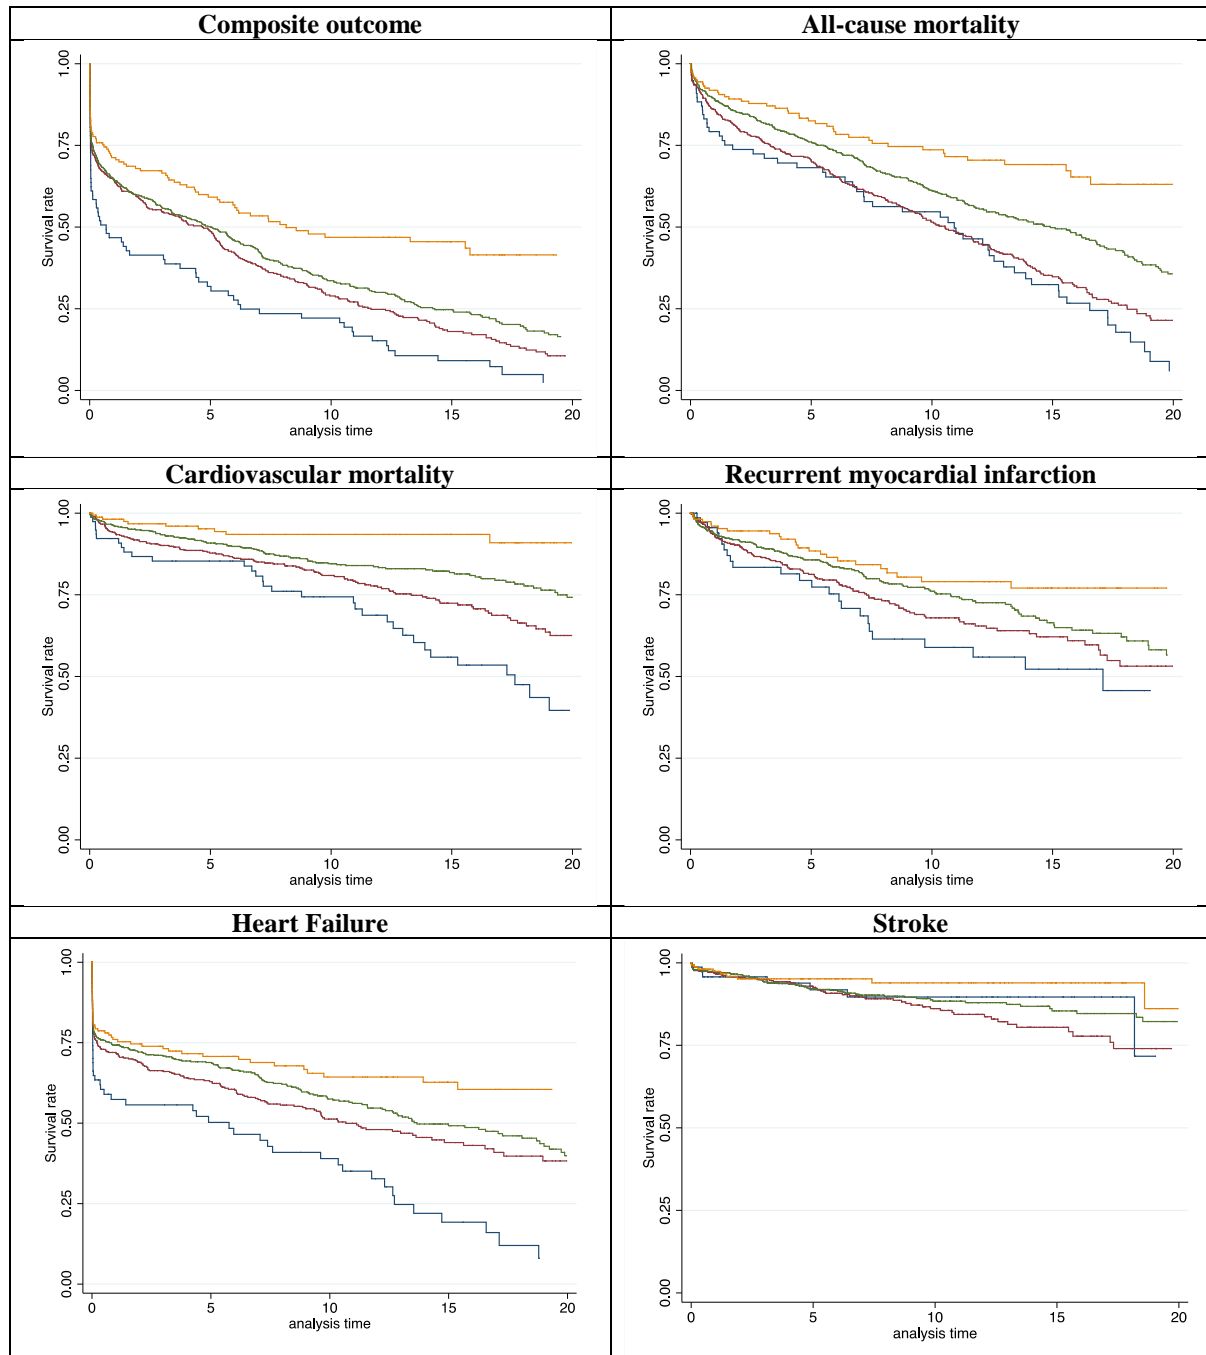

The legend indicates the score of ideal Simple 7 metrics (blue: 0-3, red: 4-6, green: 7-9, orange:  $\geq 10$ )
